# Supplementary material for: Validation of a new emotion regulation self-report questionnaire for children
Source: PubMed Central journal article supplement (PMC9773459; doi:10.1186/s12888-022-04440-x), 2022-12-22
Supplement: 12888_2022_4440_MOESM1_ESM.pdf [file 12888_2022_4440_MOESM1_ESM.pdf]

## Supplement

## Supporting Information for Validation of a New Emotion Regulation Self-Report

## Questionnaire for Children

BMC Psychiatry

Table S1

Standardized Factor Loadings (Standard Error) for the Confirmatory Factor Analyses of the Correlated Factors Models with Four Factors

| Item Number                  | Item Description<br><i>When I feel bad, I...</i>                              | Factor loading<br>(SE) |
|------------------------------|-------------------------------------------------------------------------------|------------------------|
| Functional – Distraction     |                                                                               |                        |
| 3                            | ...think about things that make me happy                                      | .86* (.03)             |
| 4                            | ...do something fun                                                           | .74* (.03)             |
| 17                           | ... remember happy things                                                     | .82* (.02)             |
| 18                           | ...try to make the best of the situation myself                               | .88* (.02)             |
| 27                           | ...do something I enjoy                                                       | .88* (.02)             |
| 32                           | ...do a relaxation exercise (e.g. imagine blowing up a balloon in my stomach) | .58* (.04)             |
| 35                           | ...count to ten                                                               | .38* (.06)             |
| 36                           | ...go to a nice place in my mind where I can relax                            | .68* (.03)             |
| 37                           | ...listen to music/a story/watch a movie                                      | .45* (.04)             |
| 39                           | ...play/paint/do handicrafts                                                  | .58* (.04)             |
| 40                           | ...solve riddles/read                                                         | .55* (.04)             |
| 46                           | ...eat something tasty                                                        | .44* (.04)             |
| 47                           | ...lie on my bed and dream about something nice/try to sleep                  | .45* (.04)             |
| Functional – Problem-Solving |                                                                               |                        |
| 1                            | ...try to change what made me feel bad                                        | .52* (.04)             |
| 6                            | ...try to make the best of it                                                 | .73* (.03)             |
| 11                           | ...think about what I could do                                                | .81* (.02)             |
| 12                           | ...tell myself that the problem is not that bad                               | .59* (.04)             |
| 15                           | ...try to forget what put me in a bad mood                                    | .63* (.03)             |
| 16                           | ...try to find the mistake in my own behavior                                 | .61* (.04)             |
| 20                           | ...think that it will pass                                                    | .60* (.04)             |
| 21                           | ...accept what makes me feel bad                                              | .55* (.04)             |
| 22                           | ...show my bad mood without annoying others                                   | .53* (.04)             |
| 28                           | ...think about a solution                                                     | .86* (.02)             |
| 29                           | ...tell myself that it is not that important                                  | .46* (.04)             |
| 42                           | ...try to stay cool and see the problem from another perspective              | .73* (.03)             |
| 43                           | ...try to think smart instead of obsessing about it                           | .83* (.02)             |
| 44                           | ...leave the situation                                                        | .78* (.02)             |
| 45                           | ...recognize the situation early that made me feel bad                        | .73* (.03)             |

## EMOTION REGULATION SELF-REPORT FOR CHILDREN

| Functional – Social Support |                                               |            |
|-----------------------------|-----------------------------------------------|------------|
| 2                           | ...tell someone about how I feel              | .79* (.03) |
| 5                           | ...keep my feelings to myself                 | .36* (.05) |
| 14                          | ...say that I am in a bad mood                | .59* (.04) |
| 19                          | ...go to someone who might be able to help me | .91* (.02) |
| 41                          | ...talk to someone about it                   | .77* (.02) |
| Dysfunctional Strategies    |                                               |            |
| 7                           | ...do not want to see anyone                  | .64* (.05) |
| 9                           | ...do not feel like doing anything            | .61* (.05) |
| 13                          | ...start a fight                              | .73* (.04) |
| 23                          | ...take my bad mood out on others             | .89* (.04) |
| 24                          | ...cannot get it out of my head               | .36* (.05) |
| 30                          | ...cannot do anything against my bad mood     | .63* (.05) |
| 38                          | ...hurt myself                                | .56* (.06) |

*Note.* SE = standard error.

\* =  $p < .001$
